# Supplementary material for: 3-Methoxybutan-2-one as a sustainable bio-based alternative to chlorinated solvents
Source: Royal Society of Chemistry journal article supplement (doi:10.1039/d1ra07322b), 2021-01-01
Supplement: d1ra07322b1.pdf [file d1ra07322b1.pdf]

## Electronic Supplementary Information (ESI) for:

### **3-Methoxybutan-2-one as a sustainable bio-based alternative to chlorinated solvents**

Saimeng Jin,<sup>a,b</sup> Fergal P. Byrne,<sup>a</sup> James H. Clark,<sup>a</sup> Con Robert McElroy,<sup>a</sup> Alex Quinn,<sup>a</sup> James Sherwood,<sup>a</sup> and Andrew J. Hunt<sup>c,\*</sup>

<sup>a</sup> Green Chemistry Centre of Excellence, Department of Chemistry, University of York, York, YO10 5DD, UK.

<sup>b</sup> School of Chemistry and Chemical Engineering, Chongqing University, Chongqing, 400044, People's Republic of China. (Current address)

<sup>c</sup> Materials Chemistry Research Center, Department of Chemistry and Center of Excellence for Innovation in Chemistry, Faculty of Science, Khon Kaen University, Khon Kaen, 40002, Thailand. \*Corresponding author: [andrew@kku.ac.th](mailto:andrew@kku.ac.th)

# 1 <sup>1</sup>H NMR, GC-MS and UV-vis. spectrum

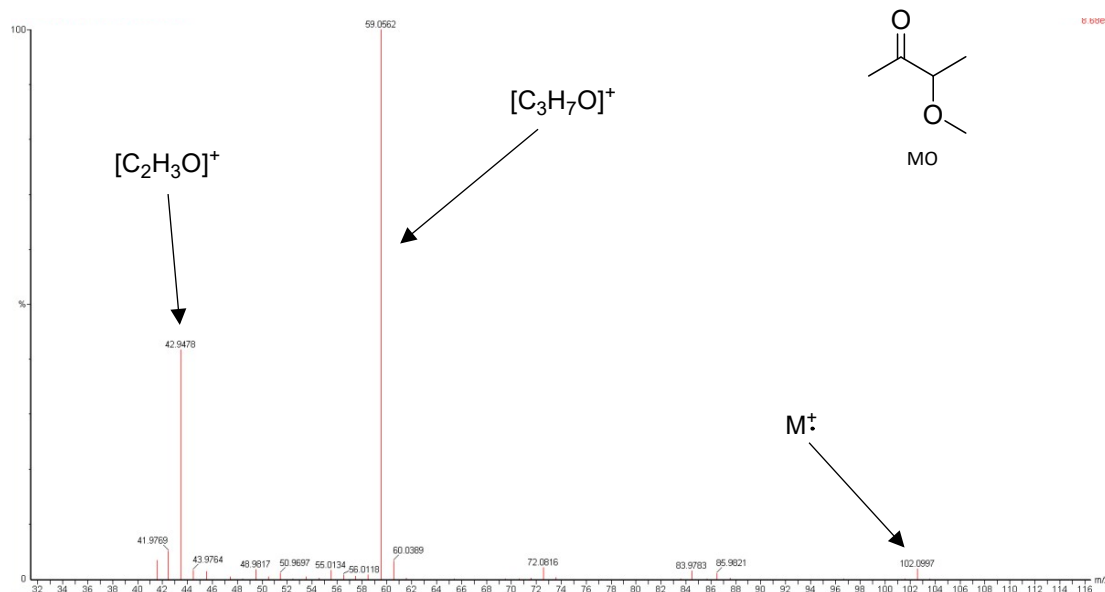

Fig. S1. Mass spectrum (EI) of MO.

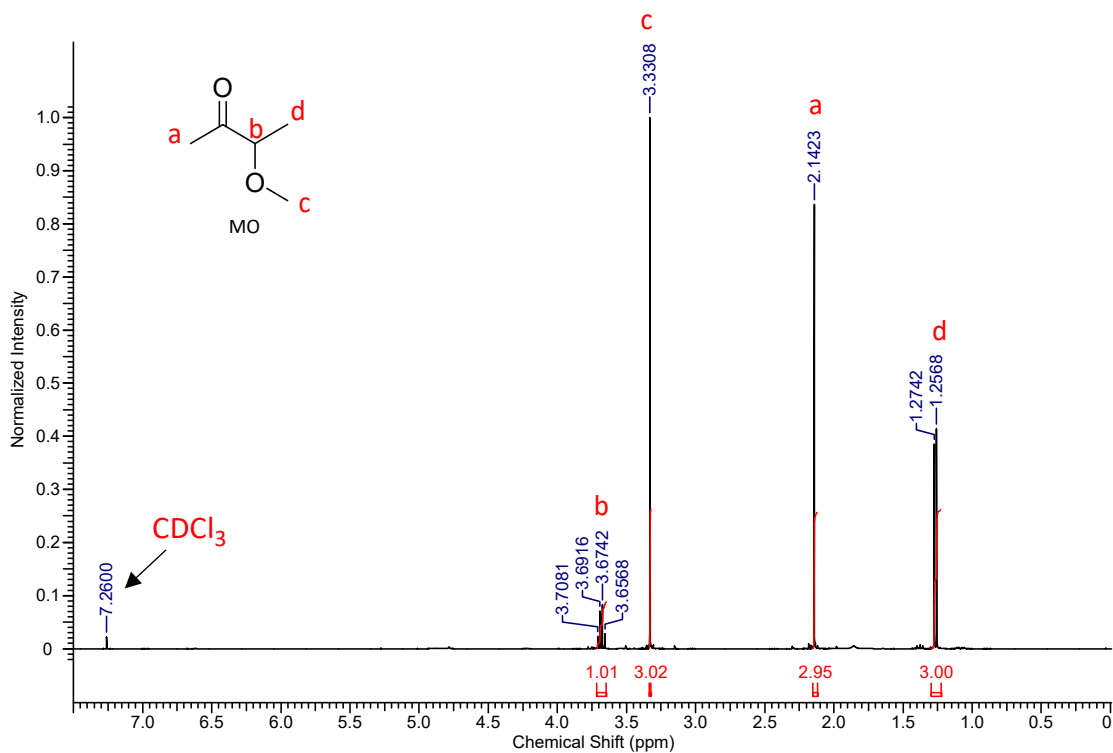

Fig. S2. <sup>1</sup>H NMR of MO.

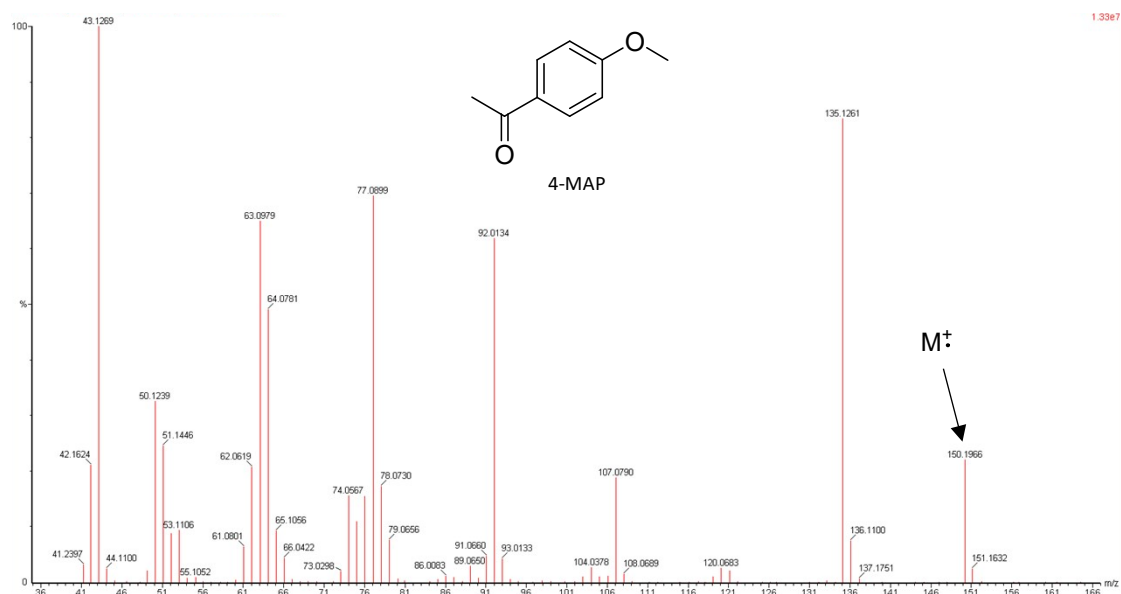

**Fig. S3.** Mass spectrum (EI) of 4-MAP.

This mass spectrum (EI) of 4-MAP obtained in this experiment was also in accordance with the standard mass spectrum.

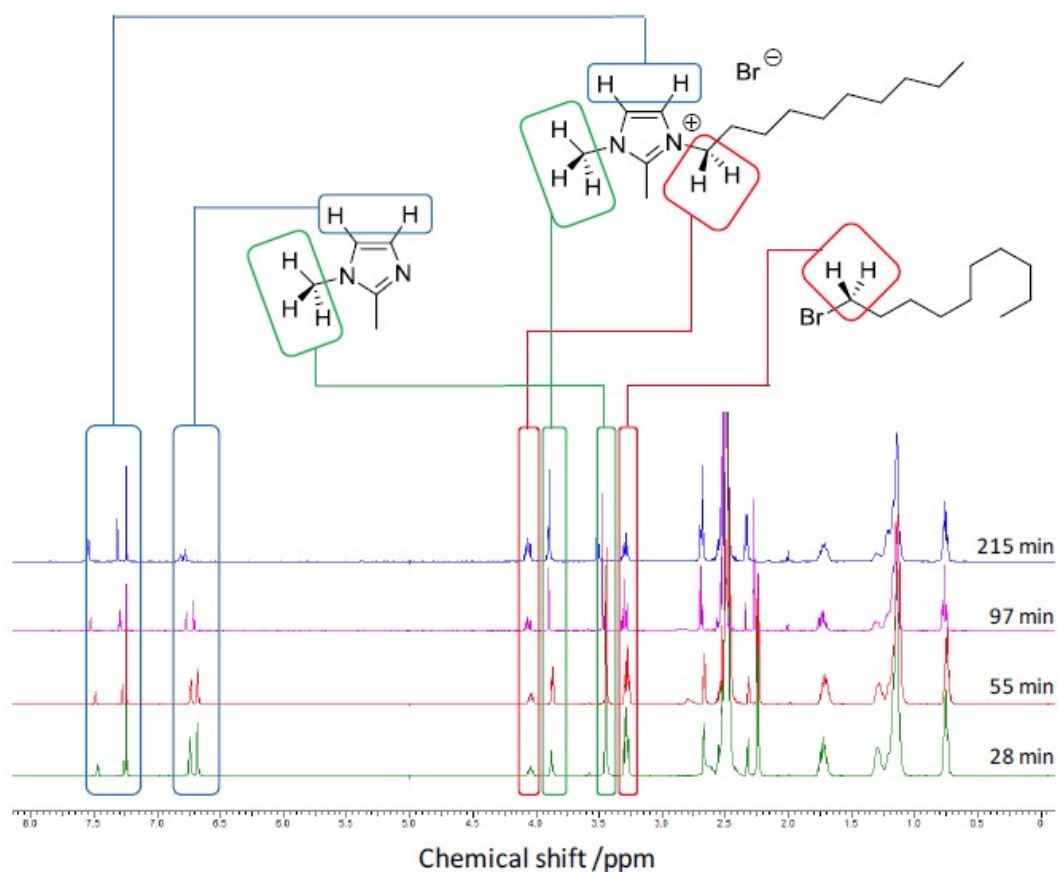

**Fig. S4.** Annotated <sup>1</sup>H NMR spectrum of a representative Menshutkin reaction in DMSO, demonstrating part way through the for the formation of 1-decyl-2,3-dimethylimidazolium bromide.<sup>1</sup>

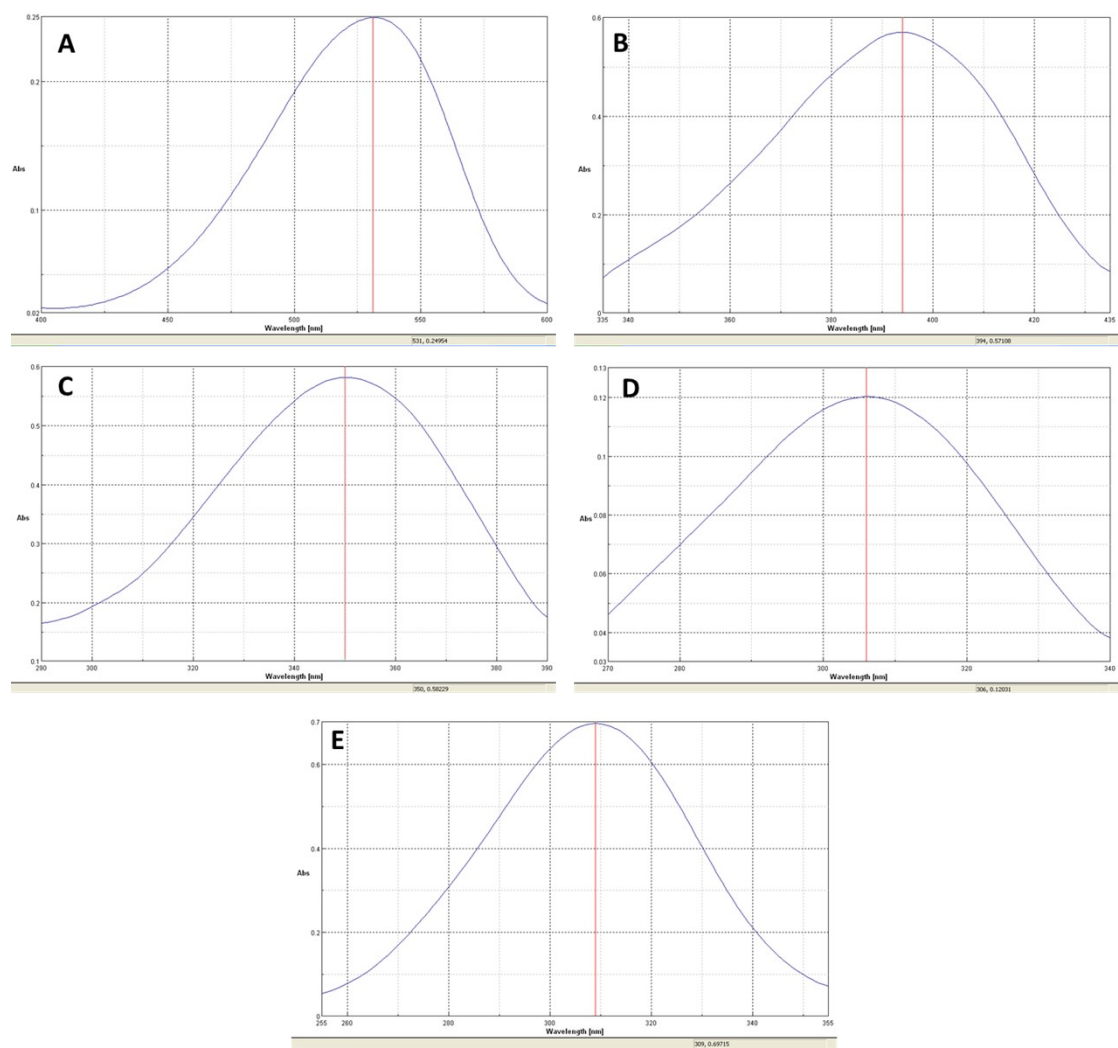

**Fig. S5.** The UV-vis. spectrum of A) Nile red (NR) dissolved in MO ( $\lambda_{\max} = 531$  nm), B) *N,N*-diethyl-4-nitroaniline (NN) dissolved in MO ( $\lambda_{\max} = 394$  nm), C) 4-nitroaniline (NA) dissolved in MO ( $\lambda_{\max} = 350$  nm), D) 4-nitrophenol (NP) dissolved in MO ( $\lambda_{\max} = 306$  nm) and E) 4-nitroanisole (NS) dissolved in MO ( $\lambda_{\max} = 309$  nm)

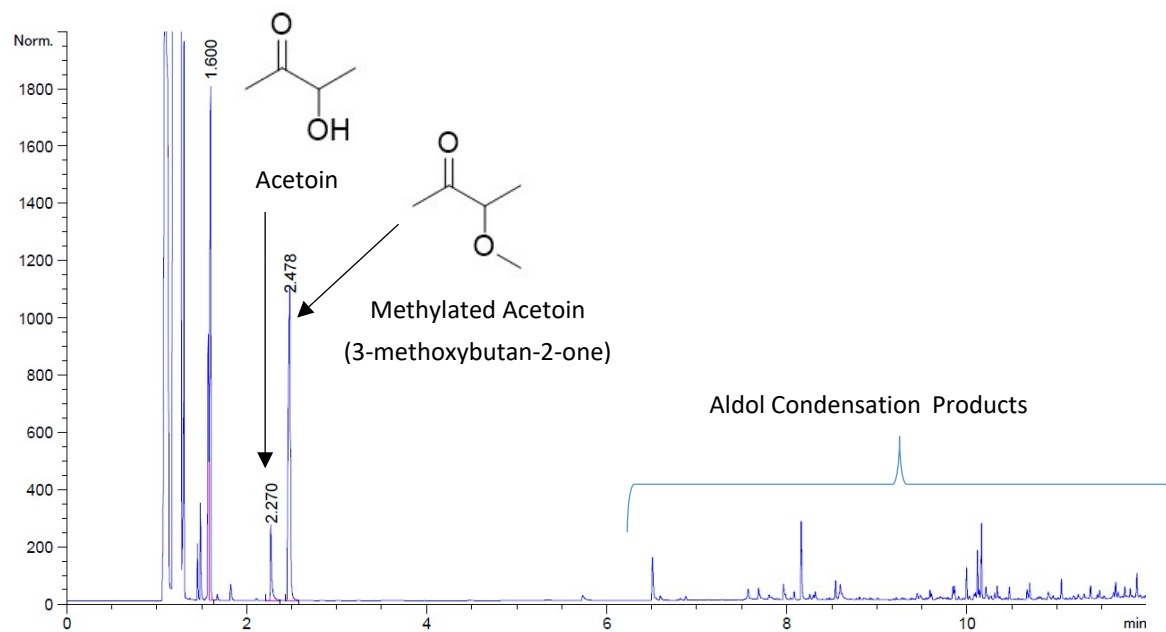

**Fig. S6.** GC spectrum of crude product from methylation of acetoin with DMC using p-TSA in catalyst screen

## 2 Optimisation of reaction time

In order to optimise the yield of MO synthesised from the reaction of dimethyl carbonate (DMC) with acetoin (catalysed by *p*-toluenesulphonic acid at 160 °C), the effect of reaction time was investigated. A molar ratio of 1:8 of acetoin to DMC was selected. The results indicated the highest NMR yield (95%) of MO is obtained after 100 min (shown in Table S1). This result demonstrates that higher isolated yield can be achieved by better distillation methodology, and currently the improvement of isolated yield of MO is still in progress.

**Table S1.** Yields study of MO by <sup>1</sup>H NMR at the condition of 1 : 8 of mole ratio of acetoin to DMC<sup>a</sup>

| Entry | Reaction time (min) <sup>b</sup> | Yield (%) of MO by <sup>1</sup> H NMR <sup>c</sup> |
|-------|----------------------------------|----------------------------------------------------|
| 1     | 10                               | 0                                                  |
| 2     | 20                               | 13%                                                |
| 3     | 30                               | 58%                                                |
| 4     | 40                               | 86%                                                |
| 5     | 50                               | 90%                                                |
| 6     | 60                               | 93%                                                |
| 7     | 70                               | 93%                                                |
| 8     | 80                               | 94%                                                |
| 9     | 90                               | 94%                                                |
| 10    | 100                              | 95%                                                |
| 11    | 110                              | 95%                                                |
| 12    | 120                              | 95%                                                |

<sup>a</sup> Reaction conditions: acetoin/DMC/PTSA = 0.5 mol : 4 mol : 0.025 mol; *T* = 160 °C. <sup>b</sup> Reaction time 0 min is defined at when the reaction temperature just reached 90 °C. <sup>c</sup> Selectivity > 99% in all reaction time towards MO calculated by <sup>1</sup>H NMR.

**Table S2:** Catalyst screening under conventional heating.

| Catalyst                    | Reaction Type   | Duration | NMR % Conversion |
|-----------------------------|-----------------|----------|------------------|
| p-TSA monohydrate           | Reaction Vessel | 1 Hour   | 76               |
| Sulphuric Acid              | Reaction Vessel | 1 Hour   | 85               |
| Hydrochloric Acid           | Reaction Vessel | 1 Hour   | 39               |
| Aluminium (III) Chloride    | Reaction Vessel | 1 Hour   | 11               |
| Iron (III) Chloride         | Reaction Vessel | 1 Hour   | 22               |
| Montmorillonite K10         | Reaction Vessel | 1 Hour   | 5                |
| Al-Pillared Montmorillonite | Reaction Vessel | 1 Hour   | 6                |
| Zeolite                     | Reaction Vessel | 1 Hour   | 1                |
| Starbon A450                | Reaction Vessel | 1 Hour   | 74               |
| Boron Trifluoride           | Reaction Vessel | 1 Hour   | 13               |

|                             |                 |        |    |
|-----------------------------|-----------------|--------|----|
| Methanesulphonic Acid       | Reaction Vessel | 1 Hour | 85 |
| Oxalic Acid                 | Reaction Vessel | 1 Hour | 2  |
| Phosphoric Acid             | Reaction Vessel | 1 Hour | 66 |
| Trifluoroacetic Acid        | Reaction Vessel | 1 Hour | 0  |
| Calcium Carbonate           | Reaction Vessel | 1 Hour | 0  |
| H-Y Zeolite                 | Reaction Vessel | 1 Hour | 0  |
| $\beta$ -Zeolite, Ammonium  | Reaction Vessel | 1 Hour | 0  |
| Nafion SAC-13               | Reaction Vessel | 1 Hour | 33 |
| Tungstosilicic Acid Hydrate | Reaction Vessel | 1 Hour | 0  |

**Table S3:** Catalyst screening under microwave heating.

| Catalyst                    | Reaction Type | Duration | NMR %Conversion |
|-----------------------------|---------------|----------|-----------------|
| p-TSA monohydrate           | Microwave     | 20 Mins  | 100             |
| Sulphuric Acid              | Microwave     | 5 Mins   | 100             |
| Phosphoric Acid             | Microwave     | 1 Hour   | 66              |
| Starbon A450                | Microwave     | 1 Hour   | 87              |
| Methanesulphonic Acid       | Microwave     | 1 Hour   | 89              |
| Tungstosilicic Acid Hydrate | Microwave     | 10 Mins  | 79              |
| H-Y Zeolite                 | Microwave     | 1 Hour   | 31              |
| $\beta$ -Zeolite, Ammonium  | Microwave     | 1 Hour   | 61              |
| Nafion SAC-13               | Microwave     | 1 Hour   | 77              |
| Tungstosilicic Acid Hydrate | Microwave     | 1 Hour   | 86              |
| p-TSA monohydrate           | Microwave     | 20 Mins  | 100             |
| Sulphuric Acid              | Microwave     | 5 Mins   | 100             |

## References

- 1 J. Sherwood, PhD Thesis, University of York, 2013.
